# Supplementary material for: Three dimensional nickel–graphene core–shell electrodes
Source: Royal Society of Chemistry journal article supplement (doi:10.1039/c2jm35506j), 2012-01-01
Supplement: c2jm35506j.pdf [file c2jm35506j.pdf]

## Supplementary Info

### Three Dimensional Nickel-Graphene Core-Shell Electrodes

Xiaoyin Xiao<sup>1</sup>, Joseph R. Michael<sup>1</sup>, Thomas Beechem<sup>1</sup>, Anthony McDonald<sup>1</sup>, Mark Rodriguez<sup>1</sup>, Michael T. Brumbach<sup>1</sup>, Timothy N. Lambert<sup>1</sup>, Cody M. Washburn<sup>1</sup>, Joseph Wang<sup>2</sup>, Susan M. Brozik<sup>1</sup>, David R. Wheeler<sup>1</sup>, D. Bruce Burckel<sup>1\*</sup>, and Ronen Polsky<sup>1\*</sup>

<sup>1</sup>Sandia National Laboratories, Albuquerque, New Mexico 87185, USA, <sup>2</sup>Department of NanoEngineering, University of California at San Diego, La Jolla, California 92093-0448, USA

#### List of Figures:

Figure S1: XPS of nickel-graphene core-shell electrode. Top: blue, green, and red curves show the C1S peak of HOPG, graphene/Ni, and graphene after Ni etching respectively versus the pre-annealed amorphous carbon electrode (purple curve).

Figure S2 Expanded elemental peaks from Ni/graphene core/shellelectrode (red curve), nickel foil (green curve), and nickel-sputtered porous carbon (purple curve).

Figure S3: Focused ion beam cross sectional imaging of partially graphitized sample. Red arrows indicate surface bound carbon islands.

Figure S4: Enlarged back scattered image of nickel-graphene core-shell electrode showing incomplete filling of nickel core.

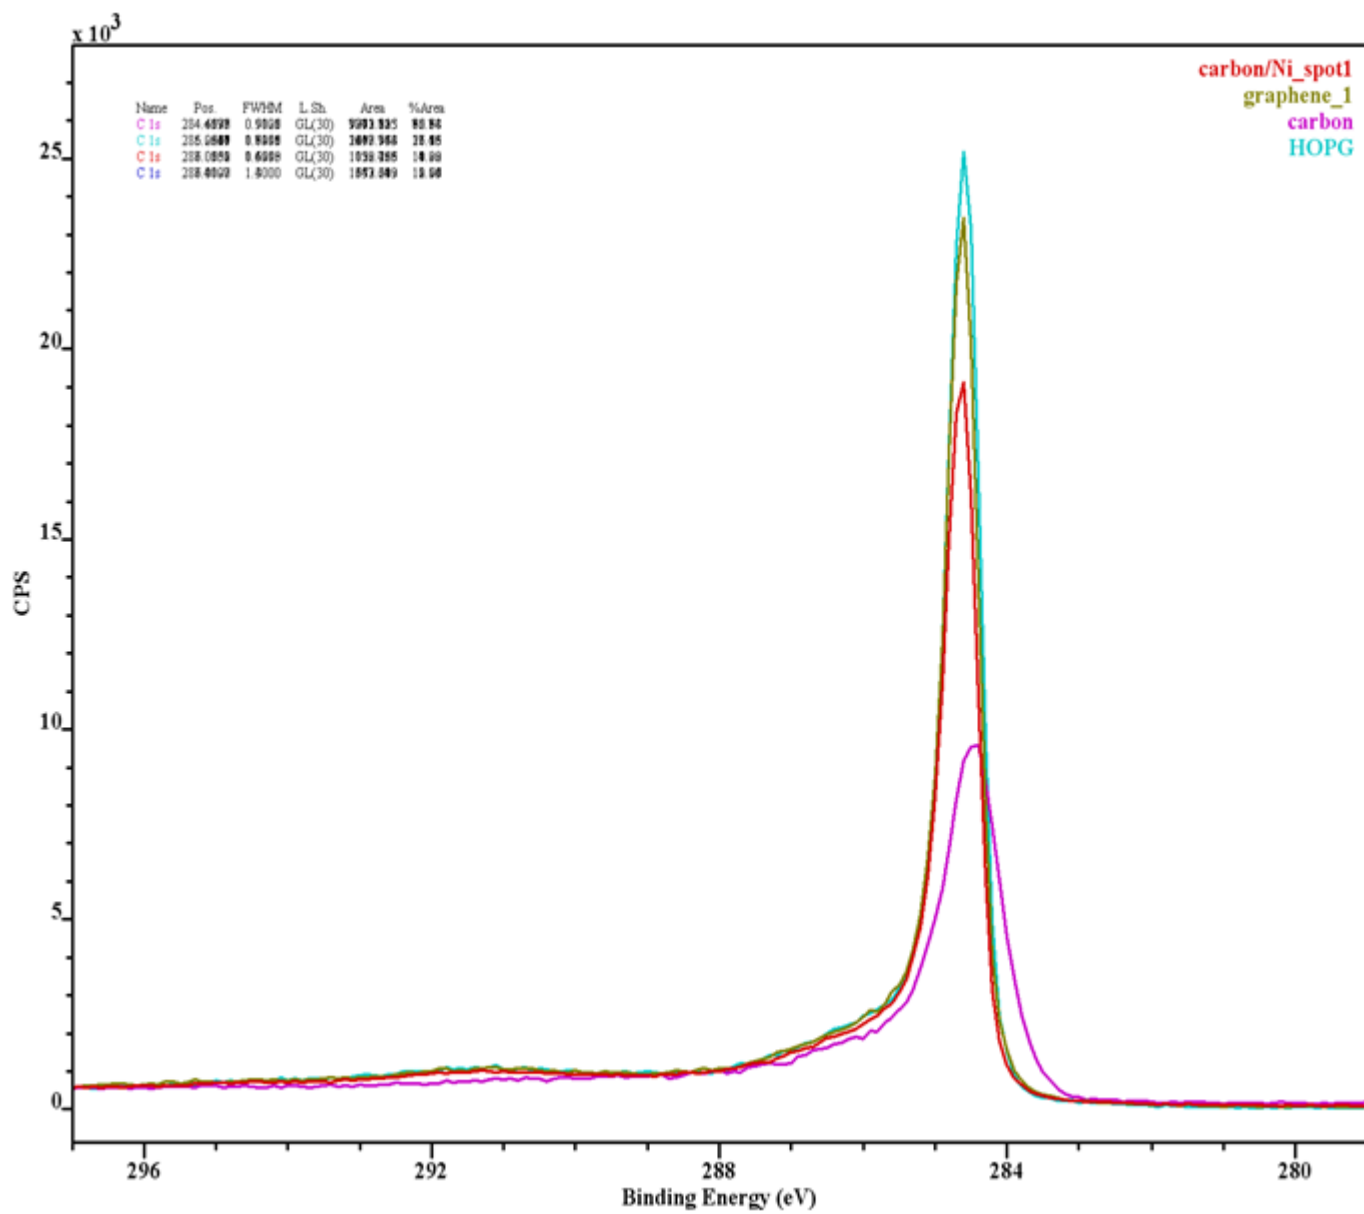

Fig. S1

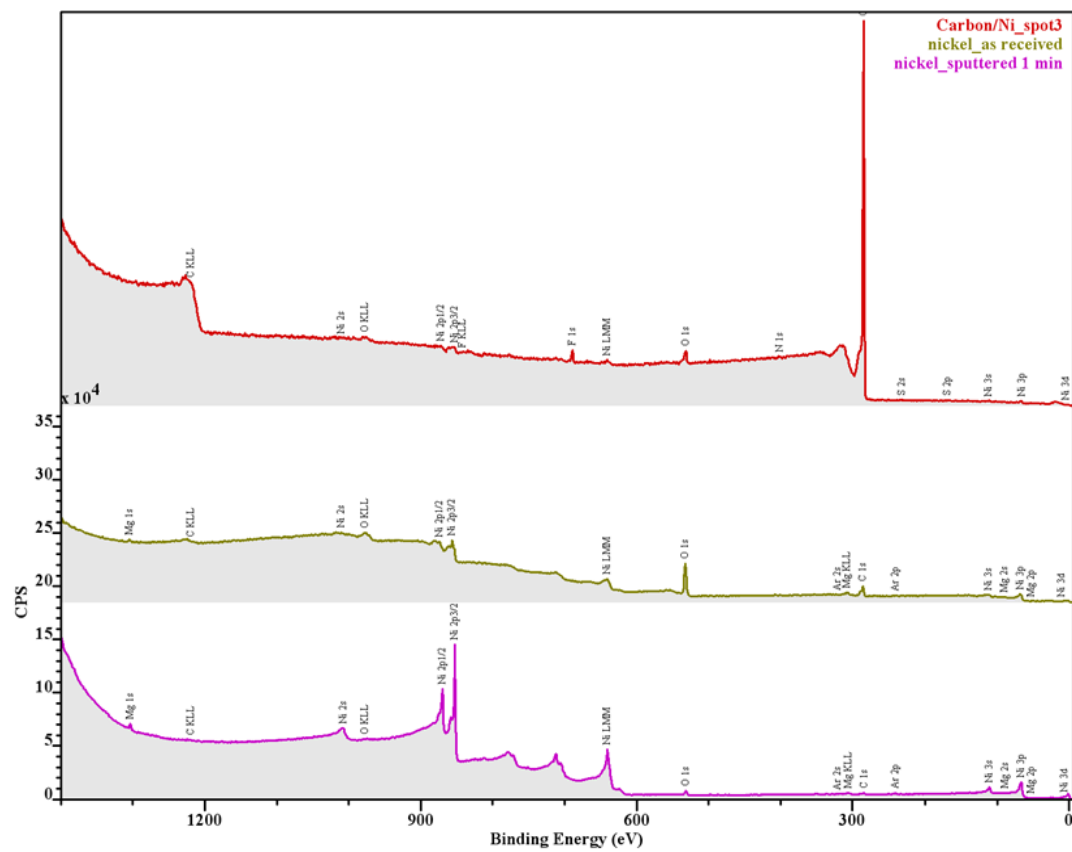

Fig. S2

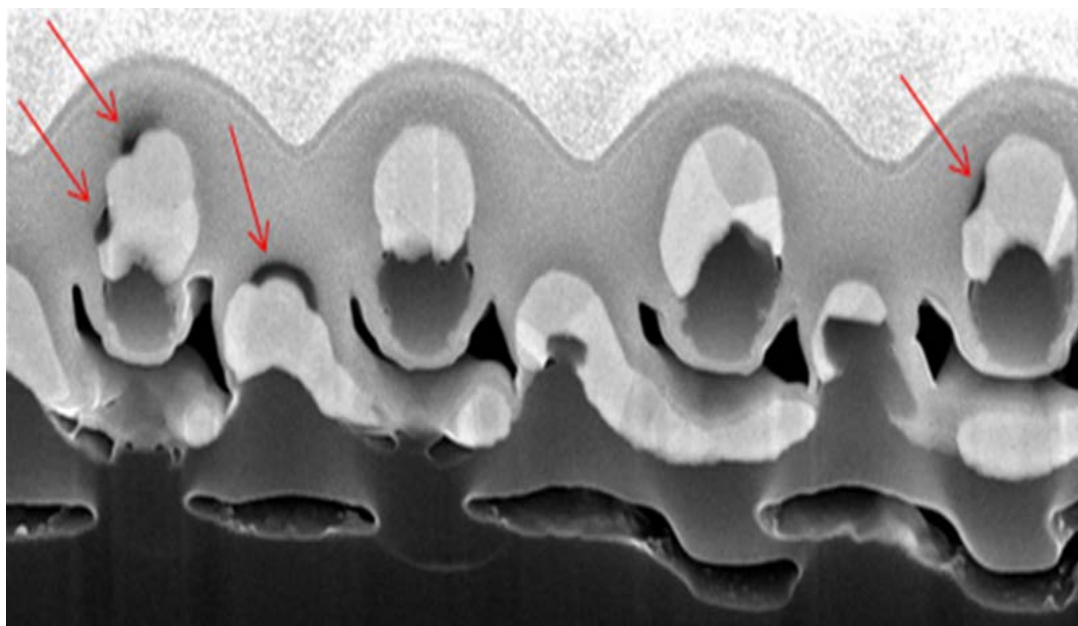

Fig. S3

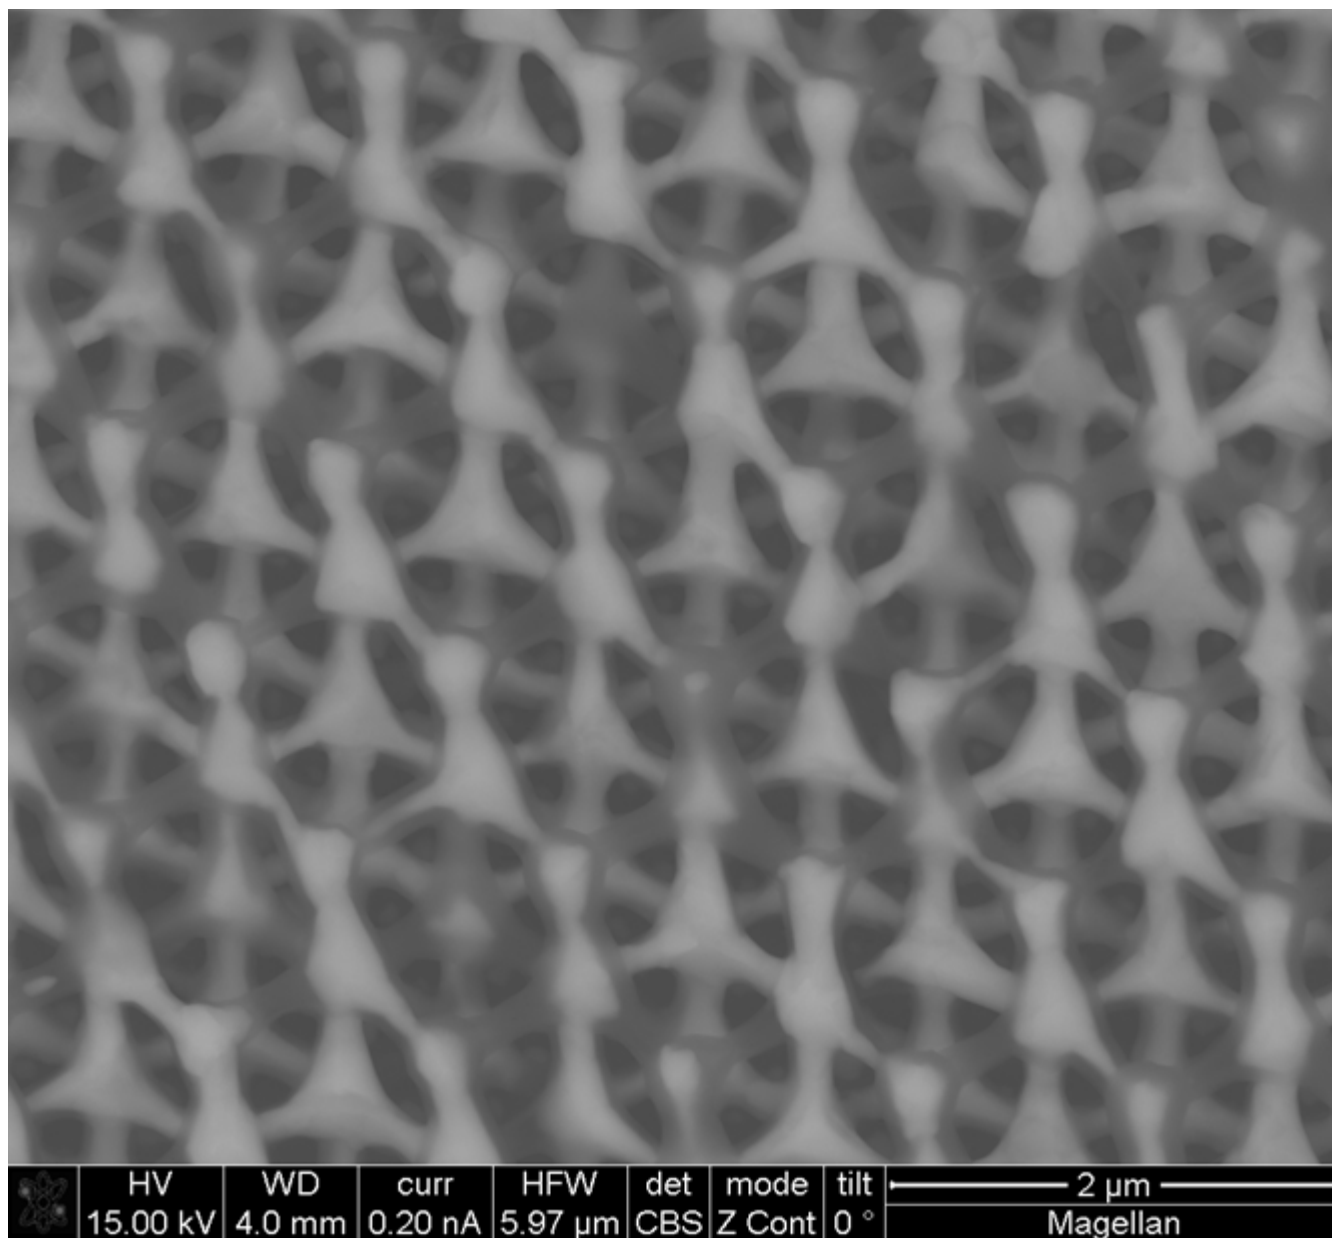

Fig. S4
